# Supplementary material for: Hydrophobic magnetic nanoparticle assisted catanionic surfactant supramolecular solvent microextraction of multiresidue antibiotics in water samples
Source: Royal Society of Chemistry journal article supplement (doi:10.1039/d1ay00525a), 2021-01-01
Supplement: d1ay00525a1.pdf [file d1ay00525a1.pdf]

# **Hydrophobic magnetic nanoparticles assisted cationic surfactant supramolecular solvent microextraction of multiresidue antibiotics in water samples**

**Jia Xu,<sup>ab</sup> Cao Li,<sup>a</sup> Xiao Li<sup>a</sup> and Yuxiu Xiao<sup>\*a</sup>**

<sup>a</sup> Key Laboratory of Combinatorial Biosynthesis and Drug Discovery (Ministry of Education), and School of Pharmaceutical Sciences, Wuhan University, Wuhan, 430071, China

<sup>b</sup> Institute of Maternal and Child Health, Wuhan Children's Hospital (Wuhan Maternal and Child Healthcare Hospital), Tongji Medical College, Huazhong University of Science & Technology, Wuhan, 430016, China

Corresponding author: Yuxiu Xiao

E-mail address: yuxiuxiao2011@whu.edu.cn, 99783508@qq.com

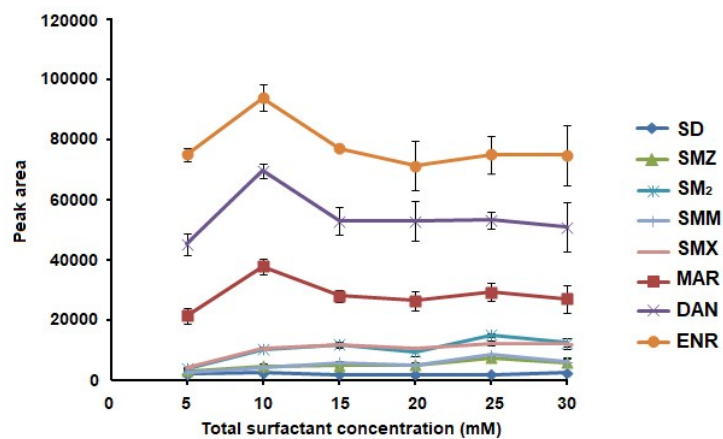

**Fig. S1** Effect of total surfactant concentration on the peak area of FQs and SAs. Conditions: LA:DTAOH=5:5 mol/mol, HFIP=5% (v/v), SUPRAS microextraction for 5 min, 10 mg Fe<sub>3</sub>O<sub>4</sub>@SiO<sub>2</sub>@C18 nanoparticles, the adsorption of SUPRAS by MNPs for 10 s vortex, elution with 1 mL methanol for 10 s vortex, sample volume 10 mL.

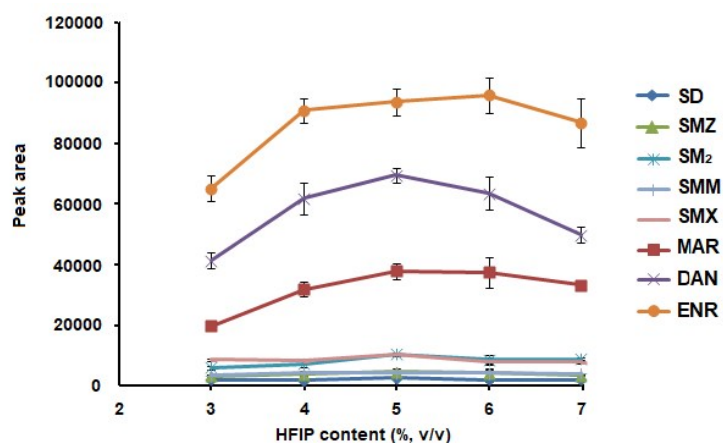

**Fig. S2** Effect of HFIP content on the peak area of FQs and SAs. Conditions: LA:DTAOH=5:5 mol/mol,  $C_{\text{total surfactant}}=10$  mM, SUPRAS microextraction for 5 min, 10 mg Fe<sub>3</sub>O<sub>4</sub>@SiO<sub>2</sub>@C18 nanoparticles, the adsorption of SUPRAS by MNPs for 10 s vortex, elution with 1 mL methanol for 10 s vortex, sample volume 10 mL.

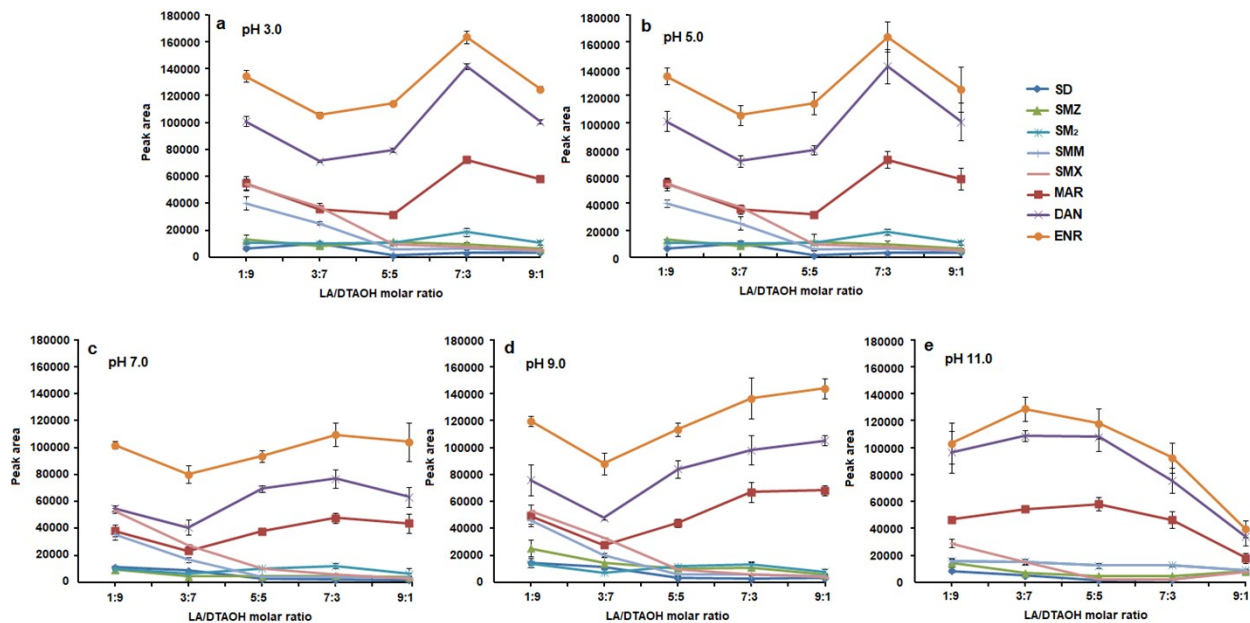

**Fig. S3** Effects of LA/DTAOH molar ratio and sample pH on the peak area of FQs and SAs. (a) pH 3.0, (b) pH 5.0, (c) 7.0, (d) 9.0 and (e) 11.0. Conditions: HFIP=5% (v/v),  $C_{\text{total surfactant}} = 10$  mM, SUPRAS microextraction for 5 min, 10 mg  $\text{Fe}_3\text{O}_4@Si\text{O}_2@C18$  nanoparticles, the adsorption of SUPRAS by MNPs for 10 s vortex, elution with 1 mL methanol for 10 s vortex, sample volume 10 mL.

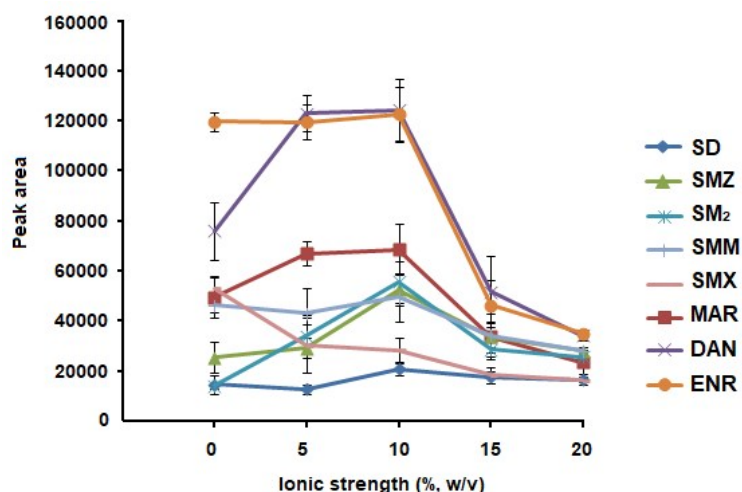

**Fig. S4** Effect of ionic strength on the peak area of FQs and SAs. Conditions: HFIP=5% (v/v),  $C_{\text{total surfactant}} = 10 \text{ mM}$ , LA:DTAOH=1:9 (mol/mol), sample pH 9.0, SUPRAS microextraction for 5 min, 10 mg  $\text{Fe}_3\text{O}_4@\text{SiO}_2@\text{C}18$  nanoparticles, the adsorption of SUPRAS by MNPs for 10 s vortex, elution with 1 mL methanol for 10 s vortex, sample volume 10 mL.

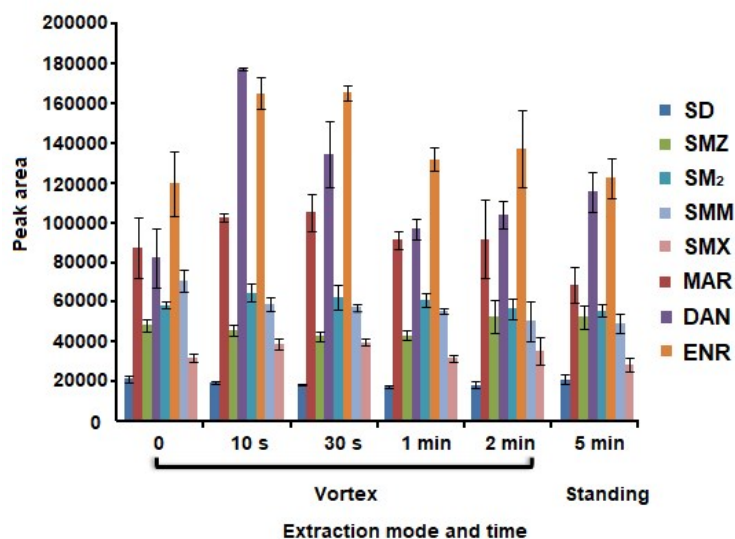

**Fig. S5** Effects of extraction mode and time on the peak area of FQs and SAs. Conditions: HFIP=5% (v/v),  $C_{\text{total surfactant}} = 10 \text{ mM}$ , LA:DTAOH =1:9 (mol/mol), sample pH 9.0, 10 mg  $\text{Fe}_3\text{O}_4@\text{SiO}_2@\text{C}18$  nanoparticles, the adsorption of SUPRAS by MNPs for 10 s vortex, elution with 1 mL methanol for 10 s vortex, sample volume 10 mL, 10% (g/mL) NaCl.

**Table S1** Chemical structures and physical properties of sulfonamides (SAs) and fluoroquinolones (FQs)<sup>a</sup>.

| Analyte            | Abbreviation    | Chemical structure                                                                  | $pK_a$                 | $\log P$     |
|--------------------|-----------------|-------------------------------------------------------------------------------------|------------------------|--------------|
| Sulfadiazine       | SD              | 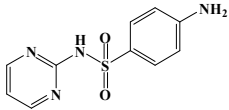   | 1.64±0.10<br>6.81±0.10 | -0.074±0.255 |
| Sulfamerazine      | SMZ             |    | 1.64±0.10<br>7.35±0.10 | 0.107±0.267  |
| Sulfadimidine      | SM <sub>2</sub> |    | 1.69±0.10<br>7.89±0.10 | 0.296±0.278  |
| Sulfamonomethoxine | SMM             |    | 2.81±0.10<br>6.67±0.30 | 1.032±0.398  |
| Sulfamethoxazole   | SMX             |   | 1.39±0.10<br>5.81±0.10 | 0.659±0.409  |
| Marbofloxacin      | MAR             |  | 6.02±0.20<br>7.34±0.42 | 0.641±0.921  |
| Danofloxacin       | DAN             |  | 6.43±0.41<br>9.00±0.20 | 1.811±0.909  |
| Enrofloxacin       | ENR             |  | 6.43±0.41<br>7.76±0.10 | 2.306±0.819  |

<sup>a</sup> The values of  $pK_a$  and  $\log P$  were found in the SciFinder website.
